# Supplementary material
Source: PubMed Central journal article supplement (PMC4834793)

---

| <b>Type of immunotherapy</b> | <b>Treatment duration (months)</b> |
|------------------------------|------------------------------------|
| 8 SCIT                       | 6 (3 – 28)                         |
| 6 SLIT                       | 30.5 (7 – 60)                      |

---



| Mediator<br>(pg/mL) | Time-point | Non-atopics     | Untreated-allergics | Immunotherapy     |
|---------------------|------------|-----------------|---------------------|-------------------|
| tryptase            | baseline   | 0.0 (0.0-2.0)   | 0.6 (0.0-9.7)       | 0.0 (0.0-8.5)     |
|                     | 5 minutes  | 0.0 (0.0-3.2)   | 16.5 (2.9-200.0)    | 11.4 (2.1-122.0)  |
|                     | 15 minutes | 0.0 (0.0-4.8)   | 5.9 (3.1-163.0)     | 4.2 (0.0-30.9)    |
|                     | 30 minutes | 0.0 (0.0-5.5)   | 3.9 (0.0-95.5)      | 1.4 (0.0-36.5)    |
|                     | 60 minutes | 0.0 (0.0-2.3)   | 1.9 (0.0-22.7)      | 0.0 (0.0-10.3)    |
| IL-4                | baseline   | 2.9 (0.0-12.2)  | 6.3 (0.0-80.3)      | 2.3 (0.0-4.5)     |
|                     | 2 hours    | 3.5 (0.0-8.5)   | 10.5 (0.0-95.9)     | 4.1 (0.0-24.5)    |
|                     | 4 hours    | 4.9 (0.0-11.3)  | 28.5 (0.7-219.8)    | 9.3 (0.0-38.0)    |
|                     | 6 hours    | 1.3 (0.0-8.2)   | 22.1 (0.2-316.9)    | 9.1 (0.0-80.8)    |
|                     | 8 hours    | 2.4 (0.0-8.6)   | 35.1 (0.4-292.0)    | 6.3 (0.6-55.2)*   |
| IL-5                | baseline   | 0.9 (0.0-1.5)   | 2.1 (0.6-20.7)      | 1.8 (0.2-2.9)     |
|                     | 2 hours    | 0.9 (0.1-2.0)   | 12.4 (0.7-125.2)    | 9.0 (1.3-79.6)    |
|                     | 4 hours    | 1.2 (0.2-3.3)   | 106.2 (0.6-894.6)   | 46.9 (3.3-216.8)  |
|                     | 6 hours    | 1.2 (0.2-9.4)   | 93.0 (0.9-1262.8)   | 58.9 (2.3-436.9)  |
|                     | 8 hours    | 1.1 (0.0-4.9)   | 143.5 (0.9-1262.3)  | 55.9 (4.5-411.2)  |
| IL-9                | baseline   | 0.2 (0.0-0.9)   | 0.7 (0.0-2.8)       | 0.7 (0.0-3.9)     |
|                     | 2 hours    | 0.1 (0.0-1.2)   | 0.5 (0.0-2.1)       | 0.6 (0.0-7.1)     |
|                     | 4 hours    | 0.1 (0.0-0.9)   | 1.3 (0.3-10.3)      | 0.7 (0.0-5.2)     |
|                     | 6 hours    | 0.1 (0.0-1.0)   | 2.2 (0.2-45.8)      | 0.8 (0.0-26.6)    |
|                     | 8 hours    | 0.1 (0.0-1.0)   | 4.3 (0.5-98.5)      | 1.2 (0.0-26.1)*   |
| IL-13               | baseline   | 4.1 (1.4-11.0)  | 5.9 (1.0-22.0)      | 3.8 (1.5-9.4)     |
|                     | 2 hours    | 3.0 (0.7-7.7)   | 11.4 (1.2-69.7)     | 5.0 (1.6-82.5)    |
|                     | 4 hours    | 2.5 (0.2-11.9)  | 27.8 (1.1-99.5)     | 5.6 (2.0-39.0)    |
|                     | 6 hours    | 1.2 (0.0-8.5)   | 22.1 (1.0-141.0)    | 3.7 (2.2-115.5)   |
|                     | 8 hours    | 1.7 (0.0-9.0)   | 39.3 (0.3-134.4)    | 3.9 (1.4-146.4)   |
| Eotaxin             | baseline   | 5.5 (0.0-29.9)  | 22.0 (2.5-65.9)     | 13.3 (0.0-43.8)   |
|                     | 2 hours    | 13.9 (0.0-42.4) | 35.7 (8.9-82.0)     | 26.9 (1.3-69.6)   |
|                     | 4 hours    | 15.5 (0.0-94.4) | 80.2 (14.6-367.9)   | 31.2 (7.3-166.1)  |
|                     | 6 hours    | 11.9 (0.0-45.1) | 89.9 (11.2-459.3)   | 39.9 (0.0-198.6)  |
|                     | 8 hours    | 14.9 (0.0-47.7) | 86.0 (8.9-645.0)    | 48.8 (0.0-270.5)† |

| Mediator<br>(pg/mL) | Time-point | Non-atopics           | Untreated-allergics   | Immunotherapy         |
|---------------------|------------|-----------------------|-----------------------|-----------------------|
| IL-8                | baseline   | 1009.9 (527.6-3333.5) | 1384.4 (257.5-4168.5) | 807.5 (71.0-2247.5)   |
|                     | 2 hours    | 655.1 (304.2-1702.5)  | 548.4 (250.0-1652.0)  | 872.8 (333.8-1575.1)  |
|                     | 4 hours    | 757.5 (419.8-2245.3)  | 1018.2 (313.4-2121.5) | 867.3 (330.5-2417.1)  |
|                     | 6 hours    | 775.2 (164.4-3126.6)  | 1019.4 (313.5-3398.0) | 1022.0 (346.9-4965.3) |
|                     | 8 hours    | 965.0 (555.8-1903.3)  | 1540.9 (246.4-3851.3) | 1126.6 (441.2-2738.4) |
| IL-10               | baseline   | 2.3 (1.0-5.6)         | 4.2 (1.7-32.7)        | 3.0 (0.4-15.9)        |
|                     | 2 hours    | 6.1 (1.7-37.8)        | 8.7 (1.5-49.0)        | 1.0 (1.8-42.4)        |
|                     | 4 hours    | 5.3 (1.4-13.8)        | 17.6 (3.7-40.6)       | 7.7 (1.8-36.8)        |
|                     | 6 hours    | 5.4 (0.6-24.4)        | 16.0 (5.6-56.8)       | 6.0 (1.7-31.4)        |
|                     | 8 hours    | 5.9 (1.4-16.4)        | 18.4 (2.7-70.5)       | 8.5 (1.1-114.1)       |
| MDC                 | baseline   | 50.9 (27.7-134.9)     | 98.2 (22.5-244.9)     | 68.2 (4.4-226.2)      |
|                     | 2 hours    | 69.7 (14.7-263.3)     | 105.2 (10.1-245.7)    | 98.3 (26.1-329.9)     |
|                     | 4 hours    | 63.4 (17.3-260.0)     | 75.1 (32.3-628.4)     | 86.5 (22.8-320.3)     |
|                     | 6 hours    | 49.7 (14.7-92.2)      | 70.0 (33.0-427.3)     | 71.2 (8.6-695.9)      |
|                     | 8 hours    | 39.9 (12.3-108.6)     | 127.5 (25.6-668.5)    | 109.1 (77.6-282.7)    |
| RANTES              | baseline   | 12.5 (6.0-131.2)      | 22.1 (5.6-73.5)       | 12.7 (1.3-68.7)       |
|                     | 2 hours    | 13.6 (3.8-205.0)      | 17.7 (5.3-94.1)       | 14.8 (5.3-129.6)      |
|                     | 4 hours    | 15.3 (3.8-123.9)      | 26.0 (8.5-52.7)       | 11.2 (4.4-62.5)       |
|                     | 6 hours    | 7.4 (2.8-139.8)       | 18.0 (6.2-72.5)       | 9.4 (3.0-79.3)        |
|                     | 8 hours    | 20.1 (1.3-175.6)      | 27.8 (2.9-41.0)       | 17.9 (2.5-129.4)      |
| ECP                 | baseline   | 4.55 (3.2-16.3)       | 10.1 (4.9-14.7)       | 5.7 (3.4-14.3)        |
|                     | 2 hours    | 8.5 (4.8-13.7)        | 18.7 (11.7-45.5)      | 18.7 (9.4-91.3)       |
|                     | 4 hours    | 14.5 (7.0-36.9)       | 40.2 (23.0-96.1)      | 39.2 (25.2-134.4)     |
|                     | 6 hours    | 20.1 (4.4-25.8)       | 62.5 (25.9-75.8)      | 38.1 (17.7-79.2)      |
|                     | 8 hours    | 15.1 (8.9-21.2)       | 77.5 (41.4-96.7)      | 36.9 (20.4-81.2)      |

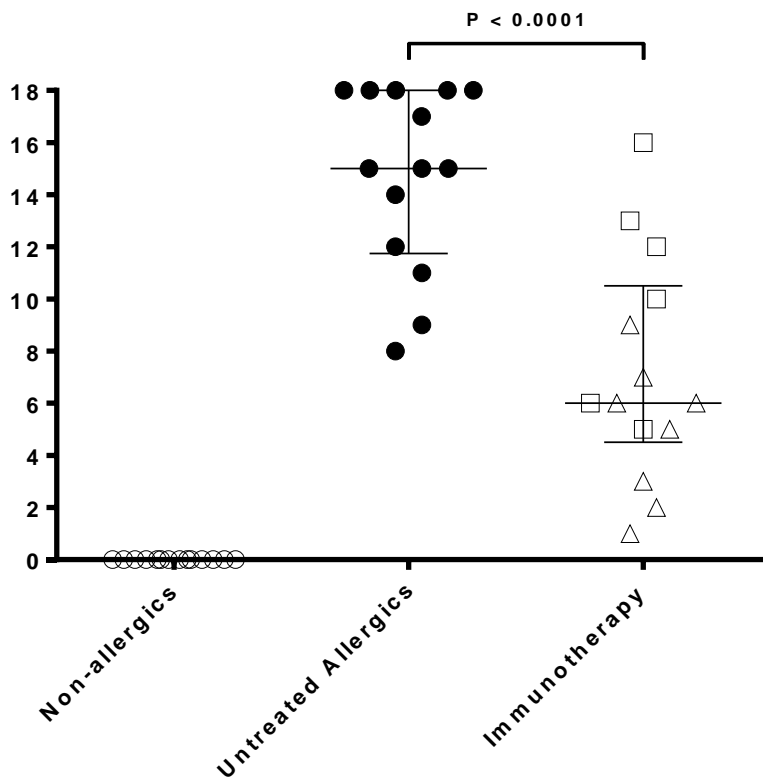

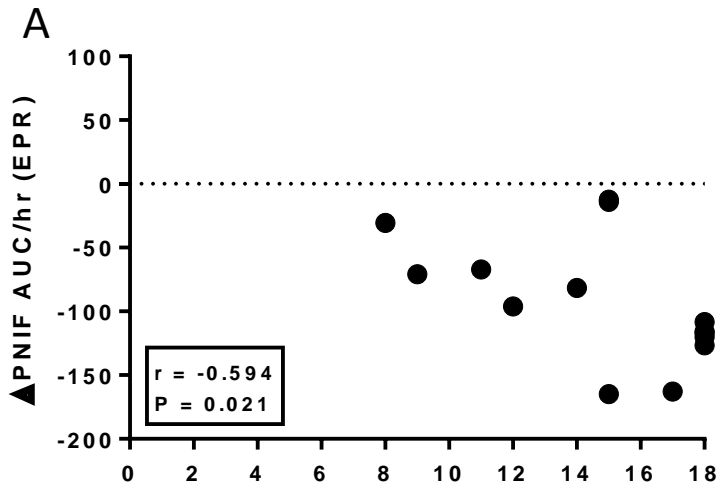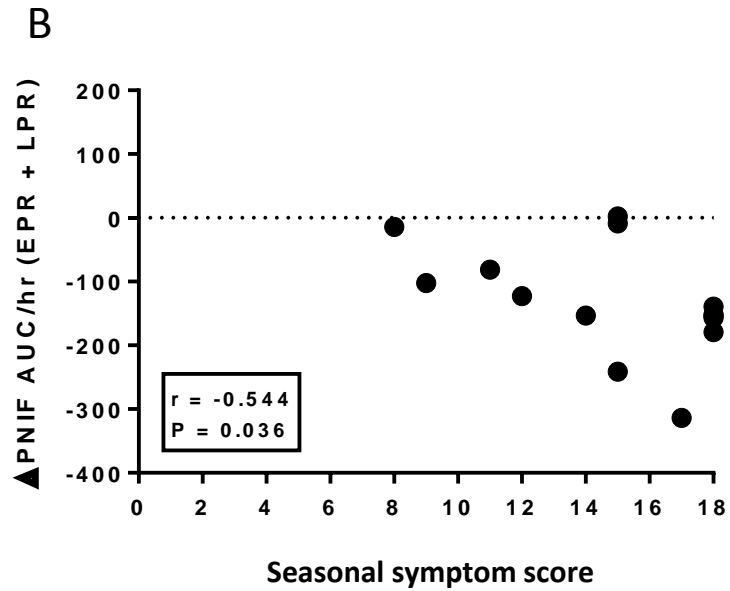

A

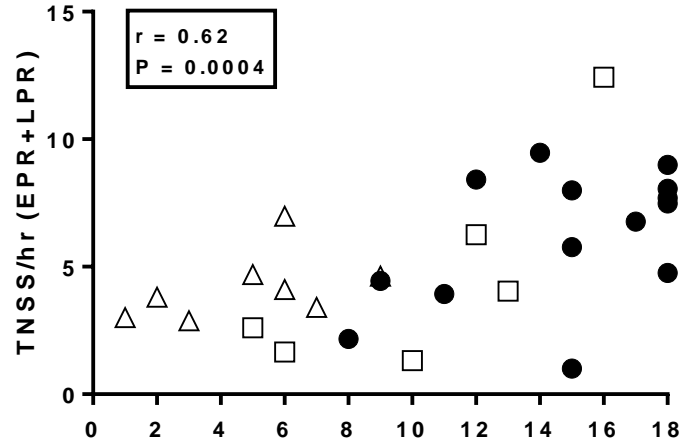

B

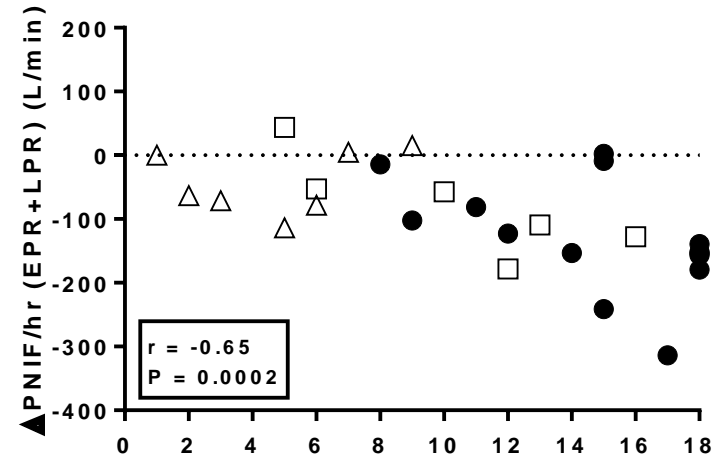

C

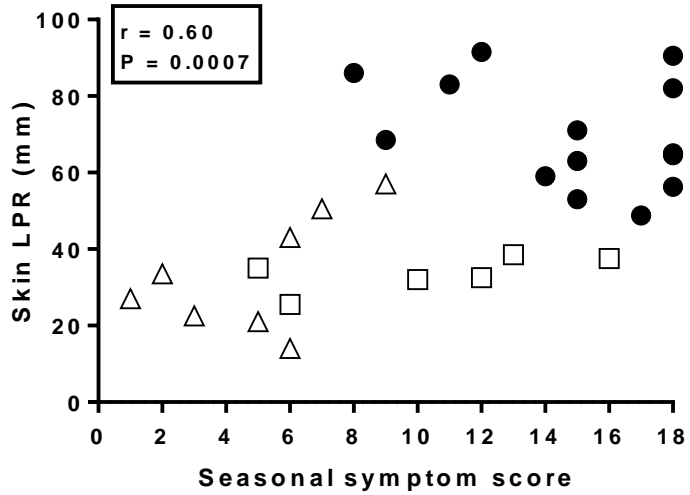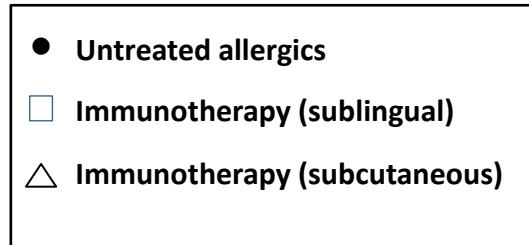

Supplement: ALL-70-689-s001.pdf [file ALL-70-689-s001.pdf]
